# Supplementary material for: A library of dimeric and trimeric phthalonitriles linked by a single aromatic ring: comparative structural and DFT investigations
Source: Royal Society of Chemistry journal article supplement (doi:10.1039/c5ce02261d), 2016-01-01
Supplement: c5ce02261d1.pdf [file c5ce02261d1.pdf]

## Supporting Information for

# A library of dimeric and trimeric phthalonitriles linked by a single aromatic ring : Comparative structural and DFT investigations

Muzaffer Köç,<sup>a</sup> Yunus Zorlu,<sup>a</sup> Ümit İşci,<sup>a</sup> Savaş Berber,<sup>b</sup> Vefa Ahsen,<sup>a</sup> Fabienne Dumoulin<sup>a\*</sup>

<sup>a</sup> Gebze Technical University, Department of Chemistry, 41400 Gebze, Kocaeli, Turkey.

E-mail: [fdumoulin@gtu.edu.tr](mailto:fdumoulin@gtu.edu.tr). Fax: +90 262 605 31 05; Tel: +90 262 605 30 22

<sup>b</sup> Gebze Technical University, Department of Physics, 41400 Gebze, Kocaeli, Turkey

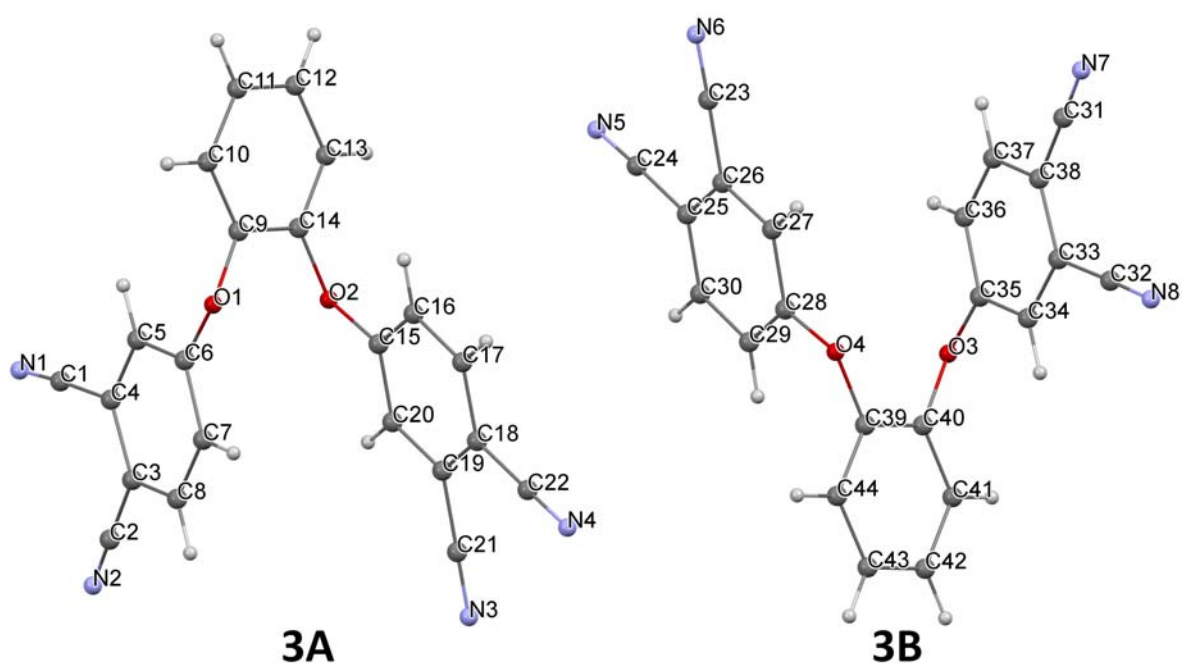

**Fig. S1.** The two molecules in the asymmetric unit of **3** (**3A** and **3B**) with displacement ellipsoids drawn at the 50% probability level.

**Table S1.** Crystal data and refinement parameters for compounds **1-5**.

| Compound                                                     | <b>1</b>                                                        | <b>2</b>                                                        | <b>3</b>                                                        | <b>4</b>                                                        | <b>5</b>                                                        |
|--------------------------------------------------------------|-----------------------------------------------------------------|-----------------------------------------------------------------|-----------------------------------------------------------------|-----------------------------------------------------------------|-----------------------------------------------------------------|
| CCDC                                                         | CCDC 968403                                                     | CCDC 968400                                                     | CCDC 968402                                                     | CCDC 968399                                                     | CCDC 968401                                                     |
| Empirical Formula                                            | C <sub>22</sub> H <sub>10</sub> N <sub>4</sub> O <sub>2</sub>   | C <sub>22</sub> H <sub>10</sub> N <sub>4</sub> O <sub>2</sub>   | C <sub>22</sub> H <sub>10</sub> N <sub>4</sub> O <sub>2</sub>   | C <sub>30</sub> H <sub>12</sub> N <sub>6</sub> O <sub>3</sub>   | C <sub>30</sub> H <sub>26</sub> N <sub>4</sub> O <sub>2</sub>   |
| Formula weight (g. mol <sup>-1</sup> )                       | 362.34                                                          | 362.34                                                          | 362.34                                                          | 504.46                                                          | 474.55                                                          |
| Temperature (K)                                              | 148(2)                                                          | 150(2)                                                          | 150(2)                                                          | 150(2)                                                          | 150(2)                                                          |
| Crystal system                                               | Monoclinic                                                      | Triclinic                                                       | Orthorhombic                                                    | Monoclinic                                                      | Monoclinic                                                      |
| Space group                                                  | <i>C</i> 2/ <i>c</i>                                            | <i>P</i> -1                                                     | <i>P</i> na2 <sub>1</sub>                                       | <i>C</i> 2/ <i>c</i>                                            | <i>P</i> 2 <sub>1</sub> / <i>n</i>                              |
| <i>a</i> (Å)                                                 | 13.7511(6)                                                      | 8.0768(5)                                                       | 20.9421(11)                                                     | 14.4563(14)                                                     | 10.2611(10)                                                     |
| <i>b</i> (Å)                                                 | 7.3953(3)                                                       | 8.5809(5)                                                       | 5.0644(3)                                                       | 24.746(2)                                                       | 13.4117(12)                                                     |
| <i>c</i> (Å)                                                 | 17.5013(8)                                                      | 13.4764(8)                                                      | 32.8970(19)                                                     | 14.626(2)                                                       | 18.9648(17)                                                     |
| $\alpha$ (°)                                                 | 90                                                              | 74.672(3)                                                       | 90                                                              | 90                                                              | 90                                                              |
| $\beta$ (°)                                                  | 91.983(2)                                                       | 88.214(3)                                                       | 90                                                              | 112.294(6)                                                      | 101.601(6)                                                      |
| $\gamma$ (°)                                                 | 90                                                              | 77.262(3)                                                       | 90                                                              | 90                                                              | 90                                                              |
| Crystal size (mm)                                            | 0.12 x 0.14 x 0.25                                              | 0.10 x 0.16 x 0.17                                              | 0.04 x 0.11 x 0.16                                              | 0.04 x 0.07 x 0.08                                              | 0.06 x 0.09 x 0.21                                              |
| <i>V</i> (Å <sup>3</sup> )                                   | 1778.70(13)                                                     | 878.24(9)                                                       | 3489.0(3)                                                       | 4841.1(9)                                                       | 2556.6(4)                                                       |
| <i>Z</i>                                                     | 4                                                               | 2                                                               | 8                                                               | 8                                                               | 4                                                               |
| $\rho_{\text{calcd}}$ (g. cm <sup>-3</sup> )                 | 1.353                                                           | 1.370                                                           | 1.380                                                           | 1.384                                                           | 1.233                                                           |
| $\mu$ (mm <sup>-1</sup> )                                    | 0.091                                                           | 0.092                                                           | 0.092                                                           | 0.094                                                           | 0.079                                                           |
| <i>F</i> (000)                                               | 744                                                             | 372                                                             | 1488                                                            | 2064                                                            | 1000                                                            |
| $\theta$ range for data collection (°)                       | 2.33 - 24.99                                                    | 2.99 - 25.00                                                    | 1.24 - 25.00                                                    | 1.65 - 25.00                                                    | 2.92 - 25.00                                                    |
| <i>h</i> / <i>k</i> / <i>l</i>                               | -16/16, -8/8, -20/20                                            | -9/9, -10/10, -16/16                                            | -24/23, -6/6, -39/33                                            | -16/17, -29/29, -17/17                                          | -10/12, -15/15, -22/17                                          |
| Reflections collected                                        | 12440                                                           | 56718                                                           | 41478                                                           | 32709                                                           | 20121                                                           |
| Independent reflections                                      | 1567 [R(int) = 0.0339]                                          | 3074 [R(int) = 0.0388]                                          | 5552 [R(int) = 0.0830]                                          | 4263 [R(int) = 0.1218]                                          | 4486 [R(int) = 0.0569]                                          |
| Data/restraints/parameters                                   | 1567 / 0 / 127                                                  | 3074 / 0 / 253                                                  | 5552 / 1 / 505                                                  | 4263 / 0 / 352                                                  | 4486 / 0 / 331                                                  |
| Goodness-of-fit on <i>F</i> <sup>2</sup>                     | 1.109                                                           | 1.099                                                           | 1.035                                                           | 1.039                                                           | 1.080                                                           |
| Final <i>R</i> indices [ <i>I</i> > 2 $\sigma$ ( <i>I</i> )] | <i>R</i> <sub>1</sub> = 0.0341, <i>wR</i> <sub>2</sub> = 0.0944 | <i>R</i> <sub>1</sub> = 0.0323, <i>wR</i> <sub>2</sub> = 0.0815 | <i>R</i> <sub>1</sub> = 0.0450, <i>wR</i> <sub>2</sub> = 0.0815 | <i>R</i> <sub>1</sub> = 0.0539, <i>wR</i> <sub>2</sub> = 0.1045 | <i>R</i> <sub>1</sub> = 0.0496, <i>wR</i> <sub>2</sub> = 0.1109 |
| <i>R</i> indices (all data)                                  | <i>R</i> <sub>1</sub> = 0.0384, <i>wR</i> <sub>2</sub> = 0.0980 | <i>R</i> <sub>1</sub> = 0.0353, <i>wR</i> <sub>2</sub> = 0.0843 | <i>R</i> <sub>1</sub> = 0.0353, <i>wR</i> <sub>2</sub> = 0.0843 | <i>R</i> <sub>1</sub> = 0.1219, <i>wR</i> <sub>2</sub> = 0.1294 | <i>R</i> <sub>1</sub> = 0.0909, <i>wR</i> <sub>2</sub> = 0.1277 |
| Largest diff. peak and hole (e.Å <sup>-3</sup> )             | 0.139 and -0.200                                                | 0.181 and -0.170                                                | 0.160 and -0.174                                                | 0.199 and -0.204                                                | 0.327 and -0.194                                                |
